# Supplementary material
Source: publisher figshare collection journal article supplement (https://geolsoc.figshare.com/articles/dataset/_/14321787)
Supplement: Supplementary file 1 [file 1]

## Sheet: Kisgerecse geochemical data
Sample	Height (cm)	δ13C	δ18O	Ca (wt%)	CaCO3 (wt%)	Fe (ppm)	Mg (ppm)	Mn (ppm)	Sr (ppm)
GM +200	329	2.91262	-1.90422	22.8142	57.0355	615.541	2823.99	311.993	120.338
GM +180	309	2.73316	-1.97468	20.5259	51.3147	377.331	2177.29	262.749	146.175
GM +160	289	2.65238	-2.58556	22.9021	57.2554	371.865	2615.6	318.349	124.801
GM +140	269	2.63433	-2.34131	29.4169	73.5423	403.499	3279.88	538.776	123.265
GM +120	249	2.59656	-2.07233	21.7207	54.3018	384.985	2554.35	313.814	155.676
GM +100	229	3.12157	-1.97955	29.3622	73.4055	353.075	3717.54	482.232	132.711
GM +90	219	2.86944	-2.58657	30.0035	75.0087	391.608	3463.64	554.895	130.839
GM +80	209	3.08645	-2.26374	30.6197	76.5492	352.459	3681.97	536.393	141.902
GM +70	199	3.10309	-2.19244	30.3972	75.9929	349.965	3510.99	601.773	126.241
GM +60	189	3.4141	-2.03919	31.9648	79.9119	386.388	3859.47	439.692	153.392
GM +50	179	3.393	-1.94089	28.905	72.2625	422.95	3222.5	495.65	125.3
GM +47	176	3.68367	-2.05829	30.9796	77.449	380.765	3343.88	523.98	150.306
GM +45	174	3.79628	-1.88075	28.6476	71.619	490	3041.9	495.238	134.381
GM +43	172	3.22507	-2.47492	24.7454	61.8635	941.752	3087.58	461.711	149.633
GM +41	170	4.22562	-1.4138	34.8023	87.0056	402.655	3405.65	457.853	150.226
GM +39	168	3.27396	-2.2996	28.2601	70.6503	581.081	3415.54	539.865	131.993
GM +37	166	3.53625	-1.99434	33.406	83.515	466.239	3614.53	570.085	140.684
GM +35	164	3.69153	-2.1044	32.5816	81.4539	466.312	3438.65	628.723	140.071
GM +33	162			31.988	79.9701	441.257	3195.21	526.467	140.599
GM +31	160	3.71408	-2.07151	32.3417	80.8542	557.917	3207.08	584.583	136.25
GM +29	158	3.58116	-2.16324	30.6571	76.6429	412.286	2997.14	536.857	128.629
GM +27	156	3.29445	-2.3118	21.8686	54.6716	418.39	2403.39	310.212	127.203
GM +25	154	3.32707	-2.2033	22.2384	55.596	404.305	2497.68	304.371	134.834
GM +23	152	3.239	-2.43403	29.4613	73.6532	440.404	3468.01	527.946	123.569
GM +20	149	2.98896	-2.14703	29.3731	73.4328	346.318	3238.31	525.871	124.328
GM +18	147	3.35549	-2.36888	30.1579	75.3947	553.56	3616.1	556.656	141.486
GM +16	145	3.61816	-2.30235	30.6624	76.6561	410.675	3373	561.181	151.561
GM +14	143			29.3155	73.2886	466.562	3406.94	549.527	137.066
GM +11	140	3.56461	-2.07518	24.055	60.1375	422.45	2775.5	380.9	130.25
GM +9	138	3.5976	-1.79571	32.8621	82.1552	384.885	3997.7	418.966	160.46
GM +7	136	3.32257	-1.59627	32.437	81.0925	381.575	4000	349.409	157.205
GM +5	134	3.21184	-1.89427	32.8452	82.113	348.87	3809.62	476.151	146.192
GM +3	132	3.00119	-2.34101	30.0321	75.0801	465.897	3285.26	544.231	133.91
GM +1	130	2.69143	-2.33357	30.4196	76.0491	396.384	3556.7	559.821	142.723
GL -1	128	2.85432	-2.71171	31.8976	79.744	296.596	3376.51	713.554	156.747
GL -3	126	2.915	-0.896298	33.3951	83.4877	370.37	4043.21	663.58	133.056
GL -5	124	2.6405	-2.22071	34.3111	85.7778	428.222	3738.67	956.889	148.533
GL -7	122	2.77955	-2.39046	33.1064	82.766	328.936	3599.15	794.468	156.511
GL -9	120	2.61838	-2.36036	35.1337	87.8342	494.92	3092.51	816.578	172.781
GL -11	118	2.71878	-2.40447	31.8578	79.6446	305.637	3736.76	720.098	147.941
GL -13	116	2.11613	-1.89406	32.6923	81.7308	373.791	3838.46	579.121	150.824
GL -15	114	2.71836	-2.27908	32.315	80.7874	375.669	3581.5	737.402	141.929
GL -17	112	2.56078	-2.34042	33.0402	82.6005	488.693	3703.52	723.367	153.392
GL -19	110	2.5769	-2.35582	30.8242	77.0604	410.989	3540.11	695.055	159.835
GL -21	108	2.24016	-2.13843	33.0214	82.5535	395.348	3413.37	624.599	183.422
GL -23	106	2.74565	-1.99064	32.256	80.6401	343.092	3536.71	643.478	160.725
GL -25	104	2.65246	-2.36734	32.4716	81.179	303.125	3732.95	725.852	153.409
GL -27	102	2.63851	-2.31145	33.9717	84.9291	335.344	3654.25	762.753	146.842
GL -29	100	2.46216	-1.99608	33.5671	83.9177	382.317	3557.93	654.878	188.049
KGL -1	99	2.33841	-2.16086	31.6618	79.1544	252.574	3527.94	706.25	160.735
KGL -3	97	2.31817	-2.29531	30.6138	76.5346	358.455	3542.68	711.789	155.244
KGL -5	95	2.20011	-2.22521	30.6301	76.5751	447.341	3395.95	817.341	159.422
KGL -7	93	2.57632	-1.83094	31.5594	78.8985	309.653	3284.65	640.099	190.718
KGL -9	91	2.53871	-2.06725	29.7988	74.4969	297.554	3603.72	682.663	150.062
KGL -11	89	2.36044	-2.30108	32.2923	80.7306	247.993	3633.8	772.535	143.697
KGL -13	87	2.35504	-1.58902	35.3545	88.3862	250.37	4123.28	669.312	155.291
KGL -15	85	2.57195	-2.27658	34.312	85.78	315.76	3768	816	162.8
KGL -17	83	2.69188	-2.3883	31.9965	79.9912	257.067	3479.86	832.862	153.004
KGL -19	81	2.65482	-2.11279	33.3628	83.4071	389.381	3607.67	789.086	168.496
KGL -21	79	2.49716	-1.95754	30.5037	76.2592	364.375	3473.9	731.25	173.934
KGL -23	77	2.38993	-2.47253	32.3763	80.9407	244.021	3597.42	858.763	151.289
KGL -25	75	3.01425	-1.99317	31.9011	79.7527	197.912	3630.77	846.154	150.33
KGL -27	73	2.9706	-2.10276	34.8112	87.0279	232.017	3383.69	931.76	169.7
KGL -29	71	2.49734	-3.8225	29.9532	74.883	257.234	3442.55	700.426	151.149
KGL -31	69	2.42152	-2.33097	32.6244	81.561	280.188	3630.52	799.061	160.845
KGL -33	67	2.35235	-2.78458	31.5893	78.9732	406.726	3745.83	789.286	164.048
KGL -35	65	2.6148	-1.73631	34.0101	85.0253	217.879	3702.53	700.505	158.333
KGL -37	63	2.3603	-2.21569	36.1508	90.377	247.698	3441.27	871.429	184.286
KGL -39	61	2.42205	-2.36871	31.6378	79.0944	247.806	3736.73	752.041	160.816
KGL -41	59	2.87421	-1.33255	31.7382	79.3455	310.655	3536.73	550.545	151.164
KGL -43	57	2.38644	-2.45071	34.8757	87.1893	162.938	3706.78	923.164	158.475
KGL -45	55	2.53284	-1.68456	28.9724	72.431	549.31	3166.21	722.759	160.414
KGL -47	53	2.73173	-2.0975	33.5586	83.8964	350.901	3281.98	840.541	158.829
KGL -49	51	2.78732	-2.07366	34.2761	85.6903	397.239	3397.01	817.91	151.94
KGL -60	40	2.68602	-1.61204	33.7321	84.3304	399.375	3383.93	700	169.554
KGL -70	30	2.55177	-2.2202	30.3077	75.7692	397.923	3693.08	705.846	146.615
KGL -80	20	2.7396	-1.35701	31.522	78.805	370.755	3992.45	588.239	152.893
KGL -90	10	2.41008	-2.55123	29.6875	74.2188	504.375	3450	795.417	162.833
KGL -100	0	2.37924	-2.12986	34.2535	85.6338	397.183	3486.62	809.859	185.704

## Sheet: Tölgyhát geochemical data
Sample	Height (m)	δ13C	δ18O	Ca (wt%)	CaCO3 (wt%)	Fe (ppm)	Mg (ppm)	Mn (ppm)	Sr (ppm)
TG 0	0	0.7237	-8.53024	22.5366	56.3415	1506.1	2023.17	2898.78	133.171
(2ml) TG 2	0.02	0.791664	-10.3782	74.7		782	2074.18	4138.18	208.582
TG 4	0.04	0.62514	-8.97646	30.175	75.4375	544	2097.75	3847.5	220.025
TG 6	0.06	-0.595515	-9.16484	26.2143	65.5357	1102.14	1865.48	1751.19	105.702
TG8	0.08	0.709792	-7.39127	22.3286	55.8214	806.786	2628.57	3632.14	175.571
TG10	0.1	0.255407	-9.46965	29.587	73.9674	5158.7	1838.91	5104.35	199.478
TG12	0.12	0.187849	-6.87948	25.6667	64.1667	4607.14	2030.95	4404.76	153.024
TG 14	0.14	0.413975	-9.03983	28.5694	71.4236	1959.03	2290.28	9055.56	183.125
TG 16	0.16	1.52774	-2.64505	29.1364	72.8409	831.818	3264.55	1450	133.818
TG 18	0.18	1.4249	-5.63899	31.1667	77.9167	640.614	2518.42	3020.18	120.351
TG 20	0.2	1.48143	-4.61432	31.9324	79.8311	764.865	2471.62	3605.41	129.068
TG 22	0.22	1.43238	-5.68308	30.5962	76.4904	639.904	2400.96	2324.04	126.923
TG 24	0.24	0.71499	-9.18	32.225	80.5625	552.75	1864	5410	140.275
TG 26	0.26	0.394235	-9.00736	25.2075	63.0189	2912.26	1751.89	5159.43	106.887
TG 28	0.28	0.264621	-9.66057	28.2439	70.6098	791.829	1531.71	3670.73	170.244
TG 30	0.3	0.190941	-9.57172	22.9695	57.4237	941.603	1692.75	3568.32	112.786
TG 32	0.32	1.50066	-3.55441	32.3587	80.8967	1248.91	2648.91	2284.78	119.457
TG 34	0.34	0.67023	-6.84354	30.0349	75.0872	1026.28	2263.95	10533.7	161.977
TG 36	0.36	0.652282	-9.2576	31.0208	77.5521	692.708	1610.83	5318.75	167.229
TG38	0.38	0.798195	-6.8125	32.1685	80.4213	743.82	2315.73	2700.56	149.888
TG40	0.4	1.68748	-3.56017	26.6889	66.7222	3335.56	3050	5890	115.889
TG 42	0.42	1.45283	-4.22068	34.041	85.1026	206.194	2736.19	2832.09	117.463
TG 44	0.44	-0.316198	-7.41249	33.7826	84.4565	750	1962.61	5082.61	132.717
TG 46	0.46	0.296962	-9.32344	28.7157	71.7892	611.569	1607.84	3184.31	155.588
TG 48	0.48	-0.528136	-4.84987	35.0417	87.6042	483.889	2581.94	2227.78	95.2083
TG 50	0.5	2.0376	-2.33612	31.1667	77.9167	573.718	2880.77	2387.18	117.897
TG 52	0.52	1.88699	-2.23334	30.21	75.525	746.9	3388	2441	140.3
TG 54	0.54	1.35298	-3.48689	31.7083	79.2708	397.333	2263.33	2434.17	103.083
TG 56	0.56	0.110878	-4.54788	22.0625	55.1562	508.482	1725.89	5650.89	136.071
TG 58	0.58	0.114878	-5.50193	28.136	70.3401	496.691	2167.28	5731.62	151.691
TG 60	0.6	-0.398222	-6.1972	30.9268	77.3171	289.39	2198.78	7992.68	159.756
TG 62	0.62	1.28711	-5.36911	23.4313	58.5781	555.312	2048.75	1607.5	92.3125
TG 64	0.64	0.675551	-3.53026	27.74	69.35	759.6	2298	9562	268
TG 66	0.66	0.681774	-3.82225	35.1842	87.9605	310.526	2190.79	1283.68	110.947
TG 68	0.68	-2.39286	-5.25435	23.5645	58.9113	5117.74	2095.16	849.032	75.0323
TG 70	0.7	-1.57966	-4.80742	24.6067	61.5169	1769.1	1720.51	1669.38	68.0899
TG 72	0.72	-5.39198	-7.13568	13.3171	33.2927	1964.63	1373.17	1478.05	68.3293
TG74	0.74	-5.80716	-8.39673	17.7039	44.2599	4064.47	2148.03	3567.11	91.4474
(A)TG 76	0.76			1.04604	2.6151	1073.88	817.987	67.4518	39.2559
(B)TG 76	0.76			1.33684	3.34211	1396.71	1184.21	180.724	54.1316
TG 78	0.78			1.75417	4.38542	410.625	709.896	81.4271	51.375
TG 80	0.8			1.44	3.6	649.444	1018.33	79	34.2
TG 82	0.82			2.24255	5.60638	1420.21	1407.45	340.372	39.9628
TG84	0.84	-1.47705	-4.59693	7.46277	18.6569	469.574	854.255	262.819	79.4149
TG 86	0.86	2.32084	-1.29627	26.4784	66.1961	374.31	2487.07	1393.97	136.81
TG 88	0.88	2.68763	-1.50553	31.9643	79.9107	626.667	3320.24	1986.9	126.667
TG 90	0.9	2.6687	-1.32744	30.9167	77.2917	381.25	2811.11	1565.28	178.472
TG 92	0.92	2.749	-1.45796	32.1667	80.4167	1165.61	2946.97	2210.61	118.591
TG95	0.95	3.05613	-2.12963	28.1471	70.3676	768.529	2875	3350	106.941
TG105	1.05	3.01937	-1.07373	33.4118	83.5294	685.882	3212.75	2107.84	122.941
TG115	1.15	3.19528	-1.36775	27.4706	68.6765	376.863	2496.08	1529.41	95.3922
TG125	1.25	3.20658	-1.89124	33.3059	83.2647	526.765	2946.47	2327.65	140.706
TG135A	1.35	3.50831	-1.81937	31.975	79.9375	801.25	3075	2490	120.5
TG135B	1.35			30.25	75.625	1161.19	3255.95	2744.05	123.81
TG155	1.55	3.5074	-1.68518	30.2833	75.7083	688.333	3255	1452.83	124.567
TG175	1.75	3.47432	-1.77286	32.1392	80.3479	557.732	3202.58	1761.34	106.031
TG195	1.95	3.34138	-2.46999	34.8816	87.2039	190.789	3392.11	1390.79	116.684
TG 220	2.2	3.09004	-2.27488	35.3158	88.2895	314.737	3257.89	1208.03	116

## Sheet: Tölgyhát mineralogy
	Calcite %	Quartz %	Illite %	Kaolinite %	I/Sm 11A %	Muscoivite %	Biotite %	Hematite %	Goethite %	Microcline %	Chlorite %	Siderite %	Anatase %	Pyrolusite %
TH-17	62.15	9.75	14.34	2.61	2.67			2.19		4.75	1.55
TH-16	66.68	8.64	19.91		1.81			1.98		3.98
TH-15	64.39	9.89	20.77		1.72			3.23
TH-14	95.77	2.26	1.6					0.38
TH-13	89.41	3.43	6.6					0.56
TH-12	95.72	1.67	2.44					0.17
TH-11	85.69	4.32	9.52					0.46
TH-10	92.69	2.35	4.35					0.62
TH-9	51.41	12.18	21.32		3.99			4.5		5.46		1.14
TH-8	2.91	30.27	41.06	0.41	7	8.29	0.79	1.3	1.7	4.15	1.71		0.41
TH-7	1.43	28.93	33.77	1.52	10.8			1.3	10.61	11.64
TH-6	42.49	5.88												51.64
TH-5	84.58	5.52	7.21	2.71				0.18
TH-4	95.75	1.74	1.85					0.66
TH-3	90.19	3.74	5.82					0.25
TH-2	94.87	2.12	2.77					0.24
TH-1	96.52	1.05	2.43
